# Supplementary material for: Low-cost membrane from polyethylene terephthalate bottle waste for water purification and chromium removal: modification and application
Source: Royal Society of Chemistry journal article supplement (doi:10.1039/d3ra00827d), 2023-01-01
Supplement: d3ra00827d1.pdf [file d3ra00827d1.pdf]

Supplementary Information

**Low-Cost Membrane From Polyethylene Terephthalate Bottle  
Waste For Water Purification And Chromium Removal:  
Modification And Application**

Badrut Tamam Ibnu Ali<sup>1</sup>, Yuly Kusumawati<sup>1</sup>, Nurul Widiastuti<sup>1\*</sup>, Juhana Jaafar<sup>2</sup>, Dety Oktavia  
Sulistiono<sup>3</sup>

<sup>1</sup>*Department of Chemistry, Faculty of Science and Data Analytics, Institut Teknologi Sepuluh Nopember, Jl. Arif Rahman Hakim,  
Kampus ITS Keputih-Sukolilo, Surabaya 60111, Indonesia*

<sup>2</sup>*Advanced Membrane Technology Research Centre (AMTEC), Universiti Teknologi Malaysia, 81310 Skudai, Johor Bahru,  
Malaysia*

<sup>3</sup>*Automotive Engineering, Engineering Department, Politeknik Negeri Jember, Jember 68101, Indonesia*

*\* Corresponding Author*

*E-mail: nurul\_widiastuti@chem.its.ac.id*

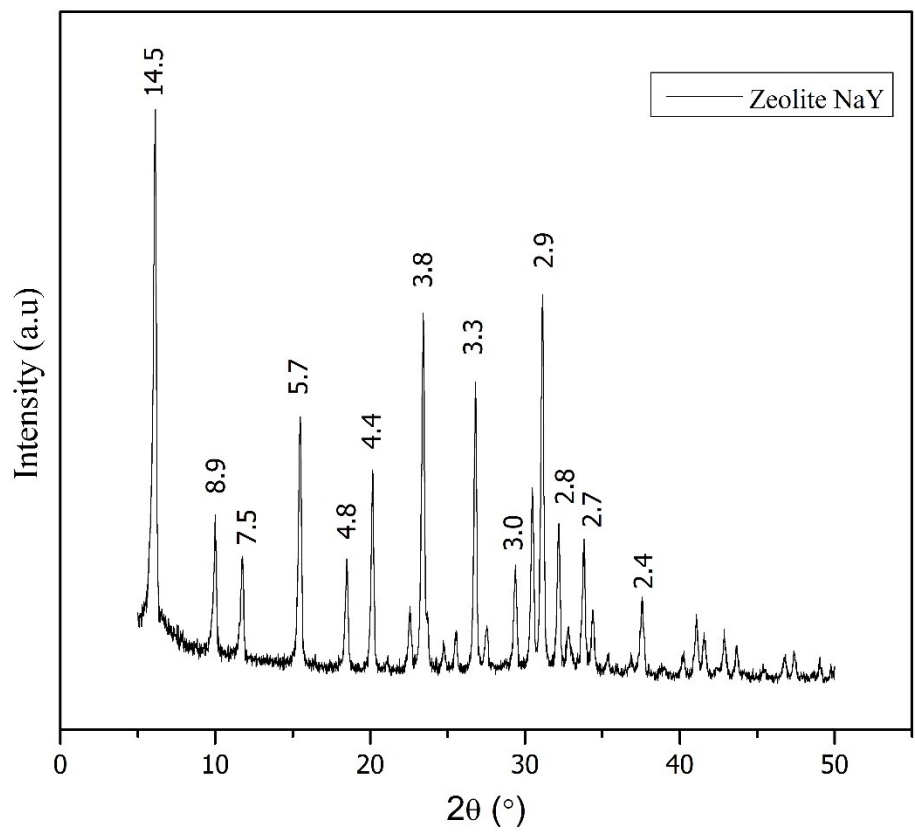

Figure S1. Diffractogram XRD of zeolite NaY with d-spacing value

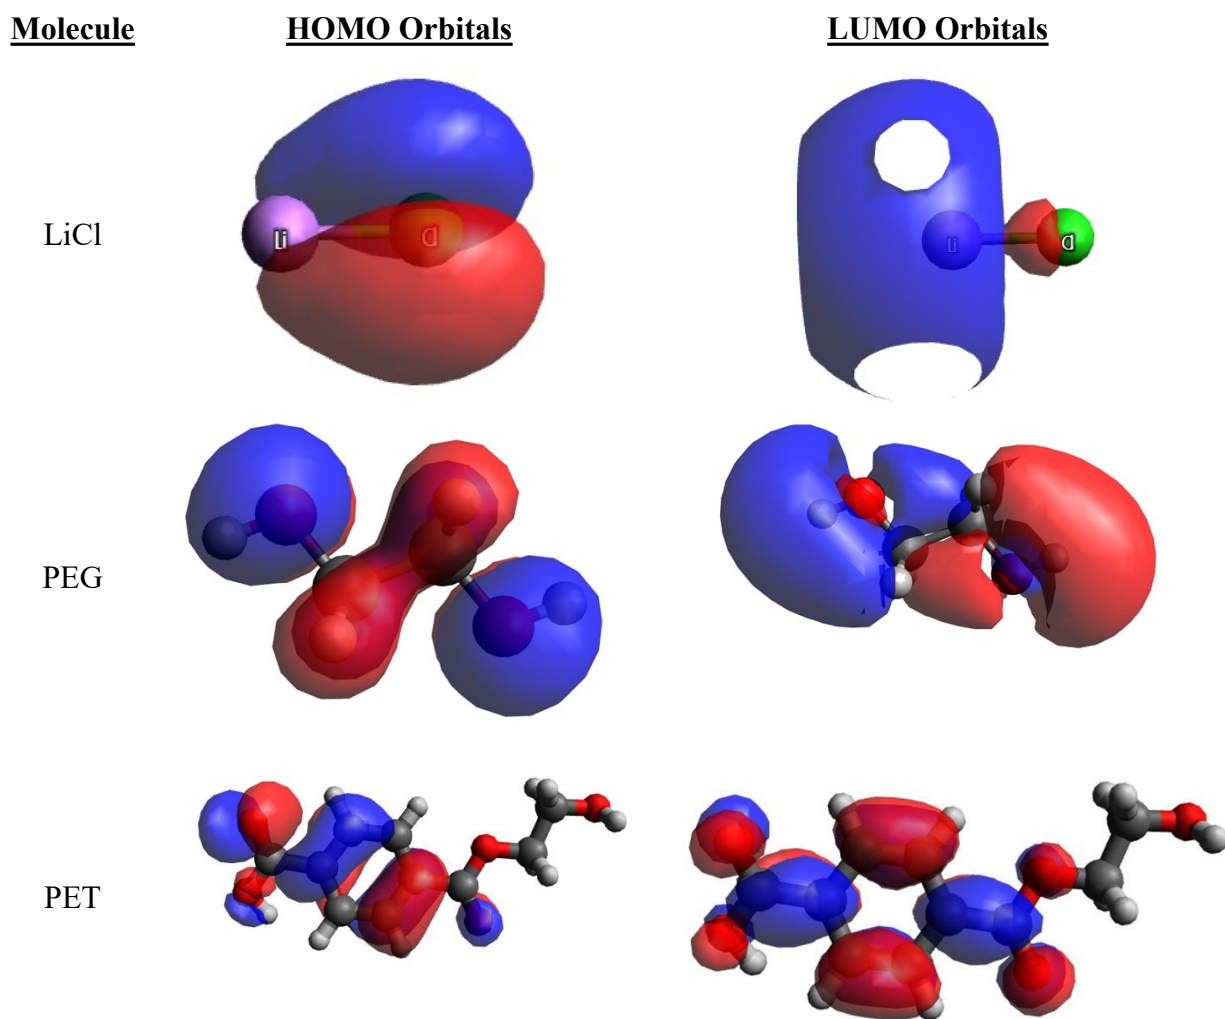

Figure S2. Orbital HOMO-LUMO dari struktur PET, LiCl, dan PEG
